# Supplementary material
Source: MDPI journal article supplement (https://www.mdpi.com/2313-0105/8/10/168)
Supplement: s1 [file s1]

*Supporting Materials*

*for*

# **Lithium-Titanium Oxide Powder Morphology Correlation with High-Rate Performance in Lithium-ion Batteries**

**Hermes A. Llaín-Jiménez <sup>1</sup>, Dominika A. Buchberger <sup>1</sup>, Magdalena Winkowska-Struzik <sup>2,#,\*</sup>,  
Maciej Ratyński <sup>1</sup>, Michał Krajewski <sup>1</sup>, Maciej Boczar <sup>1</sup>, Bartosz Hamankiewicz <sup>1,\*</sup>,  
Andrzej Czerwiński <sup>1,\*</sup>**

<sup>1</sup> Faculty of Chemistry, University of Warsaw, ul. Ludwika Pasteura 1, 02-093 Warsaw, Poland

<sup>2</sup> Łukasiewicz-Institute of Microelectronics and Photonics, al. Lotników 32/46, 02-668 Warsaw, Poland

<sup>#</sup> Current address: Faculty of Chemistry, University of Warsaw, ul. Ludwika Pasteura 1, 02-093 Warsaw, Poland

\* Correspondence: MW-S: [m.winkowska@chem.uw.edu.pl](mailto:m.winkowska@chem.uw.edu.pl); BH: [bhamankiewicz@chm.uw.edu.pl](mailto:bhamankiewicz@chm.uw.edu.pl);  
AC: [aczerw@chem.uw.edu.pl](mailto:aczerw@chem.uw.edu.pl)

**Tab. S1.** High-rate performance and characteristics of several LTO materials found in literature.

| Starting materials / synthesis details                                                                                                               | Specific Surface Area, BET [m <sup>2</sup> g <sup>-1</sup> ] | Particle size / SEM, TEM | Crystallite size XRD [nm] | Electrode mass loading [mg cm <sup>-2</sup> ] | Capacity @1C [mAh g <sup>-1</sup> ] | Capacity @10C [mAh g <sup>-1</sup> ] | Ref. |
|------------------------------------------------------------------------------------------------------------------------------------------------------|--------------------------------------------------------------|--------------------------|---------------------------|-----------------------------------------------|-------------------------------------|--------------------------------------|------|
| <b>Sol-gel</b>                                                                                                                                       |                                                              |                          |                           |                                               |                                     |                                      |      |
| Ti(OC <sub>4</sub> H <sub>9</sub> ) <sub>4</sub> and CH <sub>3</sub> COOLi /with citric acid as chelating agent                                      | -                                                            | 150-600 nm (SEM)         | -                         | -                                             | 159                                 | 147.7                                | [37] |
| Ti(OC <sub>3</sub> H <sub>7</sub> ) <sub>4</sub> and CH <sub>3</sub> COOLi / Pluronic P123 as chelating agent in CH <sub>3</sub> OH/HNO <sub>3</sub> | -                                                            | 100 nm (SEM)             | -                         | 2                                             | 180                                 | 150                                  | [70] |
| Ti(OC <sub>4</sub> H <sub>9</sub> ) <sub>4</sub> and LiOH                                                                                            | 2                                                            | 200-500 nm (SEM)         | -                         | 1.4-1.7                                       | 123.1 (@5C)                         | 102.5                                | [48] |
| TiN and LiOH in H <sub>2</sub> O / CH <sub>3</sub> OH sol. with H <sub>2</sub> O <sub>2</sub> and NH <sub>4</sub> OH                                 | 2.2                                                          | 200 nm (SEM)             | -                         | 2                                             | 159.5                               | 20                                   | [49] |
| TiO <sub>2</sub> (self-made) and LiOH in conc. HNO <sub>3</sub>                                                                                      | 2.48                                                         | c.a. 300 nm (SEM)        | -                         | 2.5                                           | 106                                 | 49.9                                 | [50] |
| Ti(OC <sub>4</sub> H <sub>9</sub> ) <sub>4</sub> and CH <sub>3</sub> COOLi / citric acid as complexing agent                                         | 5.33                                                         | 380 nm (SEM)             | -                         | -                                             | 168.2                               | 143                                  | [41] |
| <b>Combustion</b>                                                                                                                                    |                                                              |                          |                           |                                               |                                     |                                      |      |
| Citric-nitrate combustion synthesis / Ti(OC <sub>4</sub> H <sub>9</sub> ) <sub>4</sub> and LiNO <sub>3</sub> in ammonia/ethanol mixture              | -                                                            | 500 (SEM)                | -                         | 1.5                                           | 157                                 | 115                                  | [68] |
| TiO(NO <sub>3</sub> ) <sub>2</sub> (self-made) and LiNO <sub>3</sub> with cellulose fiber - combustion in Glycine-nitrate                            | 3.07                                                         | -                        | 33.1                      | -                                             | 160                                 | 125                                  | [69] |
| TiO(NO <sub>3</sub> ) <sub>2</sub> (self-made) and LiNO <sub>3</sub> with glycine as a fuel - combustion in solution                                 | 12                                                           | -                        | 80                        | 4                                             | 160 (@0.5C)                         | 140                                  | [51] |
| <b>Solid state reaction</b>                                                                                                                          |                                                              |                          |                           |                                               |                                     |                                      |      |
| TiO <sub>2</sub> and LiOH                                                                                                                            | -                                                            | 500 nm (SEM)             | -                         | 5.5                                           | 149                                 | 103.9                                | [52] |
| TiO <sub>2</sub> and Li <sub>2</sub> CO <sub>3</sub> (Urea-assisted)                                                                                 | -                                                            | 400 nm (SEM)             | -                         | -                                             | 165                                 | 126.9                                | [42] |
| TiO <sub>2</sub> and Li <sub>2</sub> CO <sub>3</sub> (Microwave-assisted)                                                                            | -                                                            | 180 nm (SEM)             | -                         | -                                             | 163                                 | 111                                  | [71] |

|                                                                                                                          |       |                   |       |         |               |              |      |
|--------------------------------------------------------------------------------------------------------------------------|-------|-------------------|-------|---------|---------------|--------------|------|
| TiO <sub>2</sub> and Li <sub>2</sub> CO <sub>3</sub>                                                                     | -     | 424 nm (SEM)      | -     | 5.5     | 152.7         | 104.6        | [43] |
| TiO <sub>2</sub> and Li <sub>2</sub> CO <sub>3</sub>                                                                     | 4.4   | 200-500 nm (SEM)  | 87    | 2.76    | 168           | 105.7        | [30] |
| TiO <sub>2</sub> and Li <sub>2</sub> CO <sub>3</sub>                                                                     | 18.3  | 162 nm (SEM)      | -     | -       | 171           | 139          | [58] |
| <b>Supercritical solvents</b>                                                                                            |       |                   |       |         |               |              |      |
| Ti(OC <sub>3</sub> H <sub>7</sub> ) <sub>4</sub> and LiOH /<br>supercritical water                                       | 10    | 150-200 nm (SEM)  | -     | -       | 193           | 160          | [61] |
| Ti(OC <sub>3</sub> H <sub>7</sub> ) <sub>4</sub> and LiOH /<br>supercritical methanol                                    | 57.8  | -                 | 11-62 | -       | 173.9         | 108.5        | [46] |
| <b>Spray-drying</b>                                                                                                      |       |                   |       |         |               |              |      |
| Ti(OC <sub>3</sub> H <sub>7</sub> ) <sub>4</sub> and CH <sub>3</sub> COOLi /<br>acetylacetone as chelating agent         | 12.04 | 500 nm (SEM)      | -     | -       | 144           | 100          | [65] |
| <b>Not specified</b>                                                                                                     |       |                   |       |         |               |              |      |
| Pilot-scale process (details not<br>specified), end process: intensive<br>grinding                                       | 22    | 50-250 nm (SEM)   | -     | 4.6-4.7 | 159           | 135          | [36] |
| <b>Microemulsion synthesis</b>                                                                                           |       |                   |       |         |               |              |      |
| Ti(OC <sub>3</sub> H <sub>7</sub> ) <sub>4</sub> and LiOH / CTAB-<br>assisted synthesis in n-pentanol<br>and cyclohexane | 46.3  | 30-50 nm (TEM)    | -     | -       | 166           | 130          | [67] |
| <b>Solvothermal</b>                                                                                                      |       |                   |       |         |               |              |      |
| Solvothermal synthesis /<br>Ti(OC <sub>4</sub> H <sub>9</sub> ) <sub>4</sub> and LiOH with<br>glycine                    | 54.8  | 100-500 nm (SEM)  | -     | 1.3     | 154           | 146          | [44] |
| <b>Hydrothermal</b>                                                                                                      |       |                   |       |         |               |              |      |
| CH <sub>3</sub> COOLi and Ti(OC <sub>4</sub> H <sub>9</sub> ) <sub>4</sub> -<br>(rheological phase reaction)             | -     | < 3 µm (SEM)      | -     | -       | 161.6         | 140.2        | [72] |
| TiOSO <sub>4</sub> and LiOH                                                                                              | -     | -                 | 12.5  | -       | 147.3 (@1.1C) | 128 (@11.4C) | [73] |
| TiO <sub>2</sub> and LiOH (Microwave-<br>assisted)                                                                       | -     | 40 nm (SEM)       | -     | 1.49    | 174           | 148          | [66] |
| Ti(OC <sub>3</sub> H <sub>7</sub> ) <sub>4</sub> and LiOH in ethylene<br>glycol and NH <sub>4</sub> OH                   | -     | c.a. 200 nm (SEM) | -     | -       | 163           | 152 (@8C)    | [74] |

|                                                                                                                                                                         |       |                     |    |     |             |            |      |
|-------------------------------------------------------------------------------------------------------------------------------------------------------------------------|-------|---------------------|----|-----|-------------|------------|------|
| Ti(OC <sub>3</sub> H <sub>7</sub> ) <sub>4</sub> and CH <sub>3</sub> COOLi                                                                                              | -     | c.a. 300 nm (SEM)   | -  | -   | 132         | 105        | [47] |
| Ti(OC <sub>3</sub> H <sub>7</sub> ) <sub>4</sub> and LiOH (CTAB-assisted)                                                                                               | 19.93 | c.a. 300 nm (SEM)   | -  | 3.5 | 162.3       | 144.9      | [60] |
| Ti(OC <sub>3</sub> H <sub>7</sub> ) <sub>4</sub> or Ti(OC <sub>4</sub> H <sub>9</sub> ) <sub>4</sub> and LiOH / with H <sub>2</sub> O <sub>2</sub> (Microwave-assisted) | 20    | -                   | 40 | 4   | 150         | 120        | [64] |
| TiO <sub>2</sub> and LiOH                                                                                                                                               | 36.76 | 40 nm (TEM)         | -  | 20  | 172         | 165        | [56] |
| Ti(OC <sub>4</sub> H <sub>9</sub> ) <sub>4</sub> and LiOH in ethylene glycol / CTAB assisted                                                                            | 38.6  | 4 µm (SEM)          | 21 | 1.1 | 164         | 154        | [54] |
| TiO <sub>2</sub> (self-made) and LiOH                                                                                                                                   | 40    | 10 nm plates (SEM)  | -  | -   | 144         | 133        | [63] |
| Ti(SO <sub>4</sub> ) <sub>2</sub> and LiOH with glycerol                                                                                                                | 85.93 | 25 nm (TEM)         | -  | -   | 170         | 165        | [57] |
| TiOSO <sub>4</sub> and LiOH                                                                                                                                             | 112.3 | 40-60 nm (TEM)      | -  | -   | 170         | 150        | [45] |
| amorphous TiO <sub>2</sub> (self-made) and LiOH                                                                                                                         | 131.2 | c.a. 200 nm (SEM)   | -  | 2   | 160         | 151        | [55] |
| Ti(OC <sub>3</sub> H <sub>7</sub> ) <sub>4</sub> and LiOH                                                                                                               | 139.4 | -                   | 12 | -   | 177 (@1.1C) | 161 (@14C) | [59] |
| Ti(OC <sub>4</sub> H <sub>9</sub> ) <sub>4</sub> and LiOH in EtOH                                                                                                       | 150.6 | c.a. 200 nm (SEM)   | -  | 6.5 | 169         | 158        | [53] |
| TiO <sub>2</sub> and LiOH, NaOH and H <sub>2</sub> O <sub>2</sub> -assisted (3-step)                                                                                    | 178   | 6.6 nm sheets (TEM) | -  | -   | 179         | 162        | [62] |

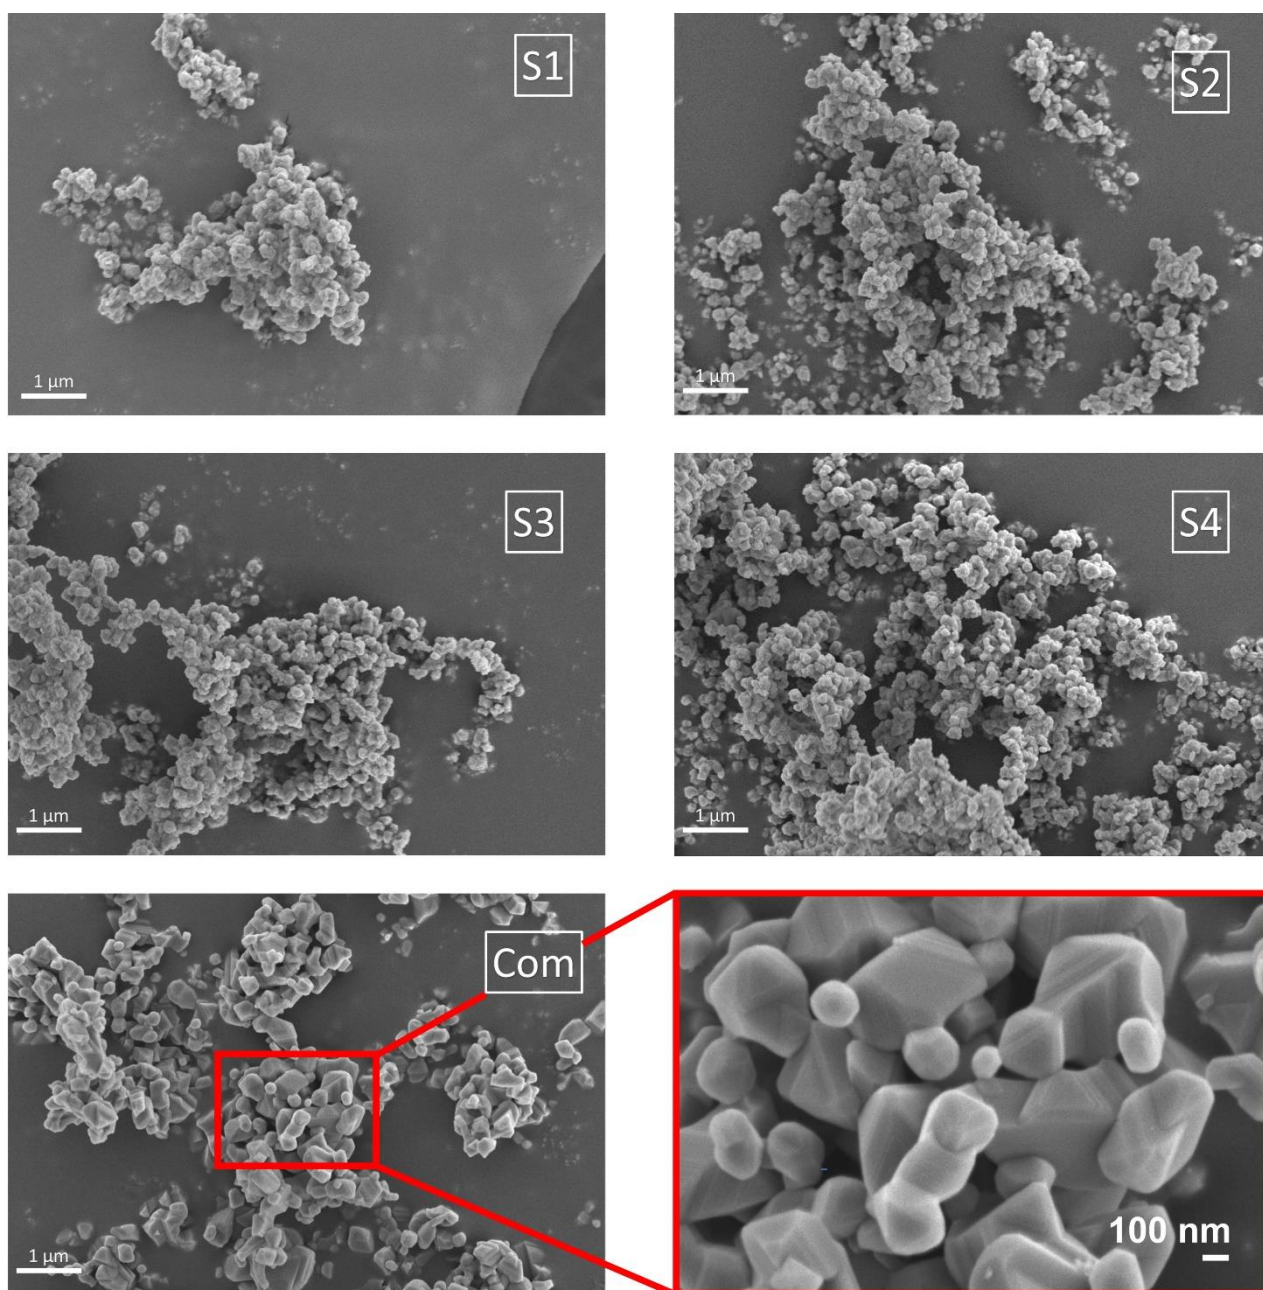

**Fig. S1.** SEM images for the sol-gel synthesized and commercial LTO samples with reference to 1 $\mu\text{m}$ .

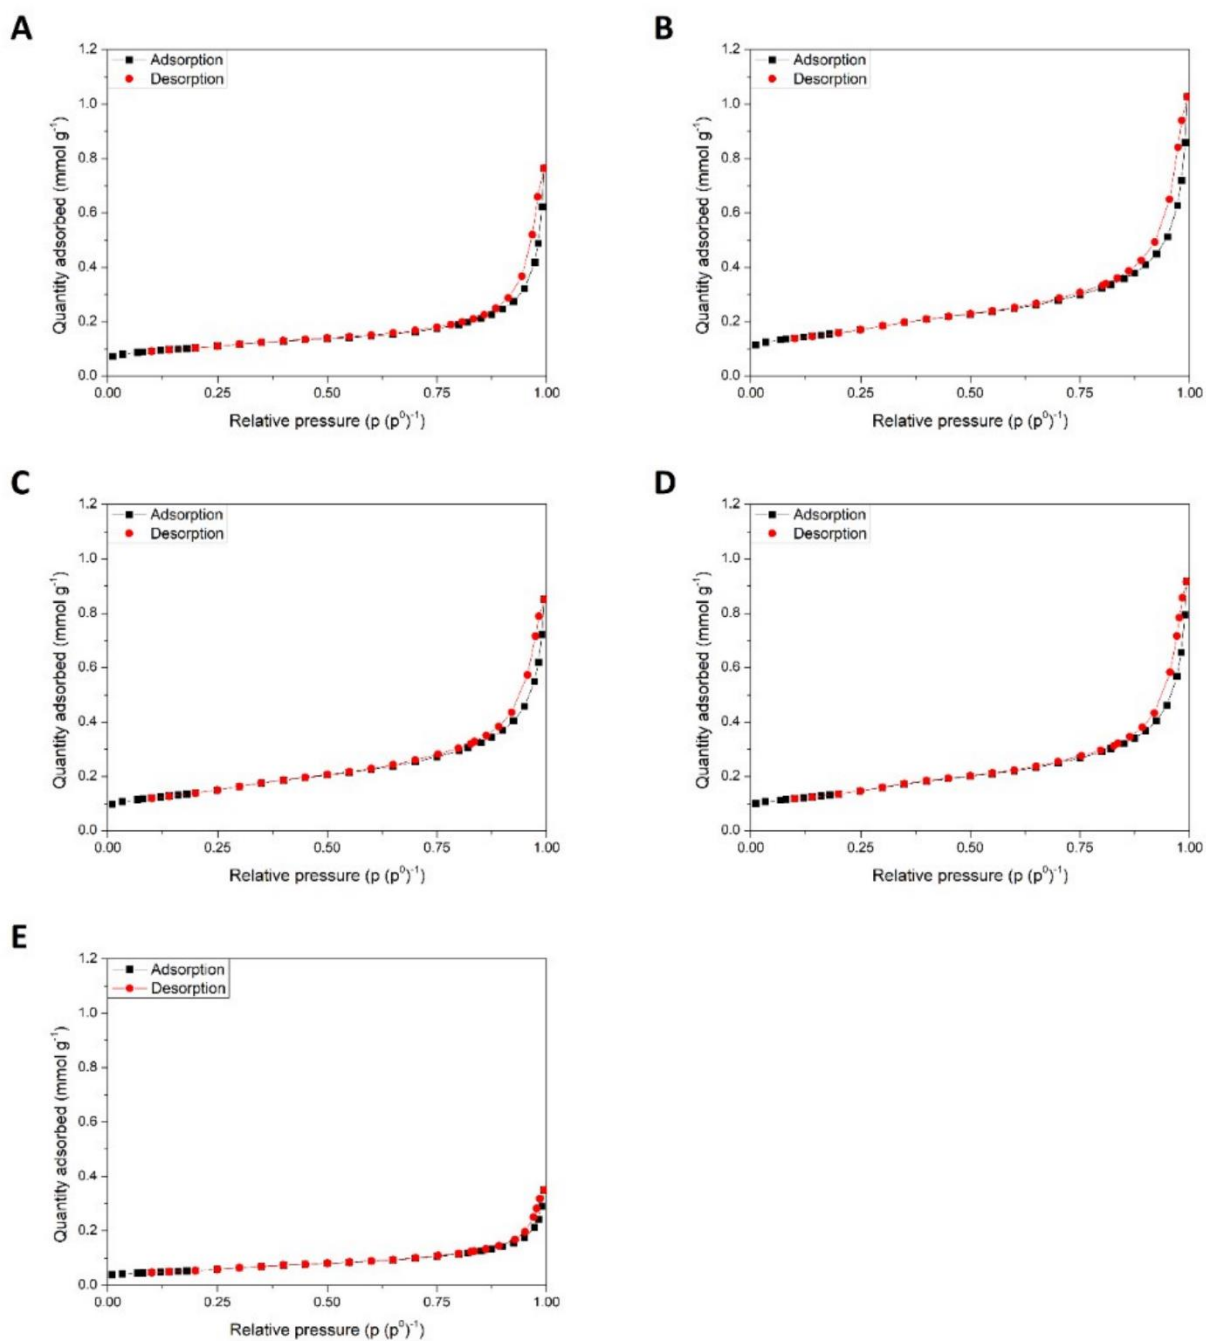

**Fig. S2.**  $\text{N}_2$  adsorption/desorption isotherms of  $\text{Li}_4\text{Ti}_5\text{O}_{12}$  powders: S1 (A), S2 (B), S3 (C), S4 (D) and Com (E).

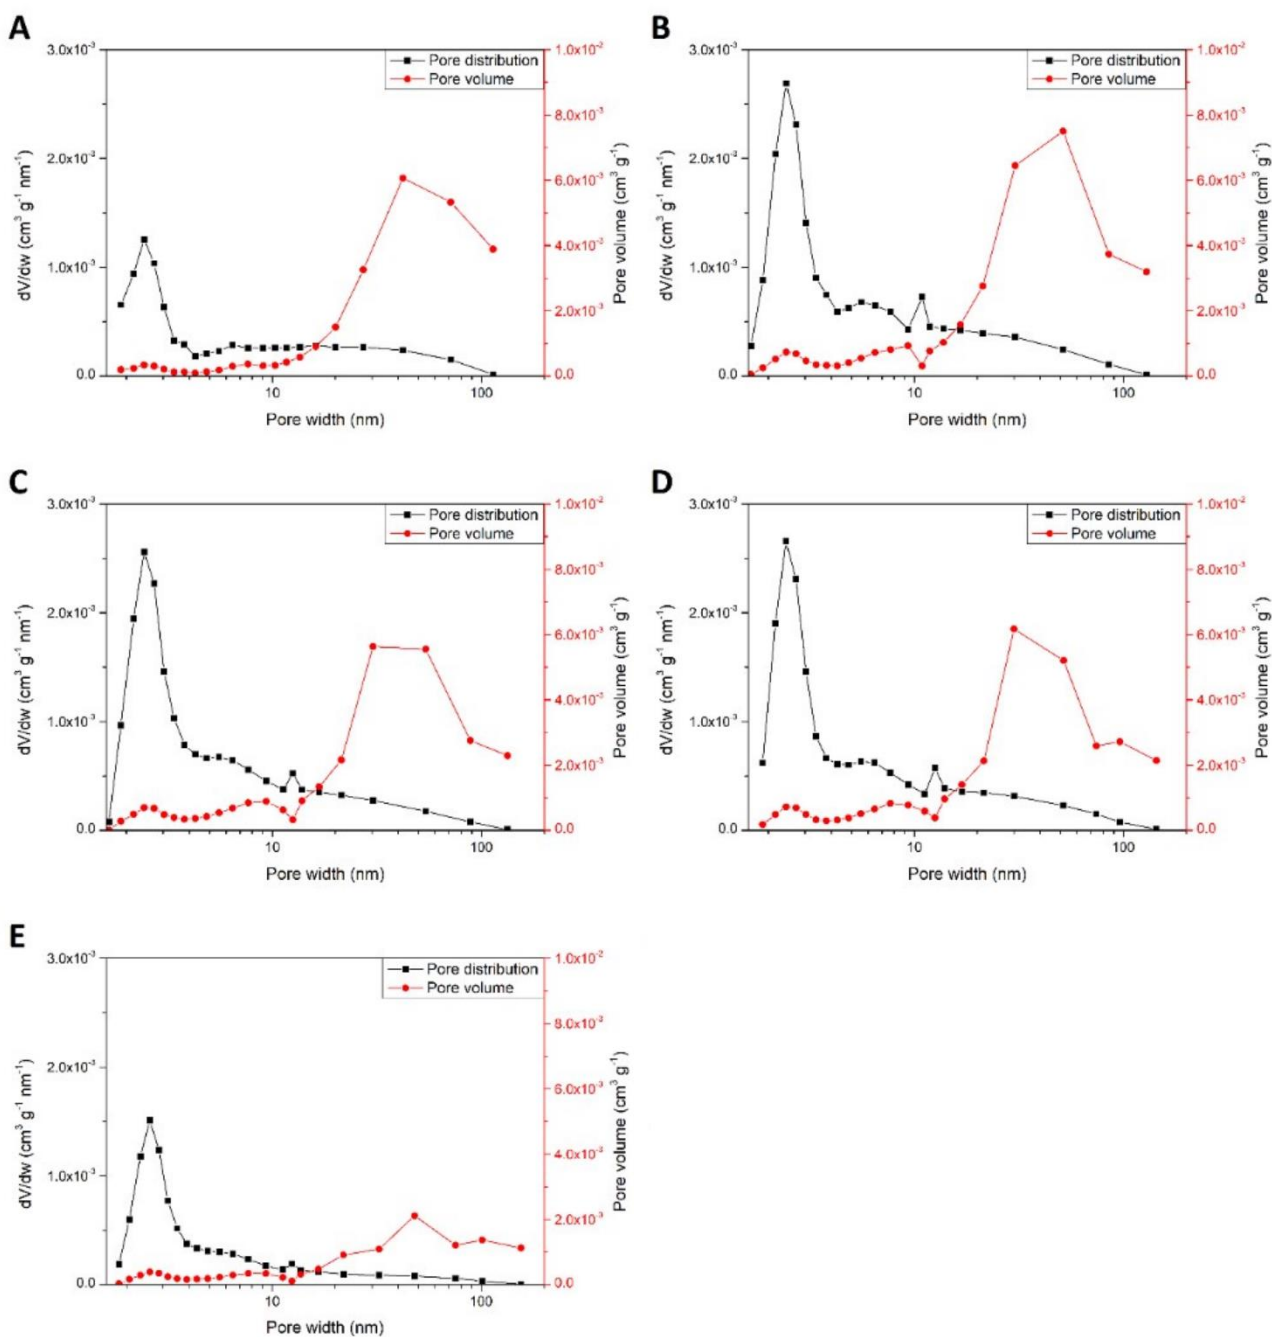

**Fig. S3.** Pore size and distribution for  $\text{Li}_4\text{Ti}_5\text{O}_{12}$  powders: S1 (A), S2 (B), S3 (C), S4 (D) and Com (E).

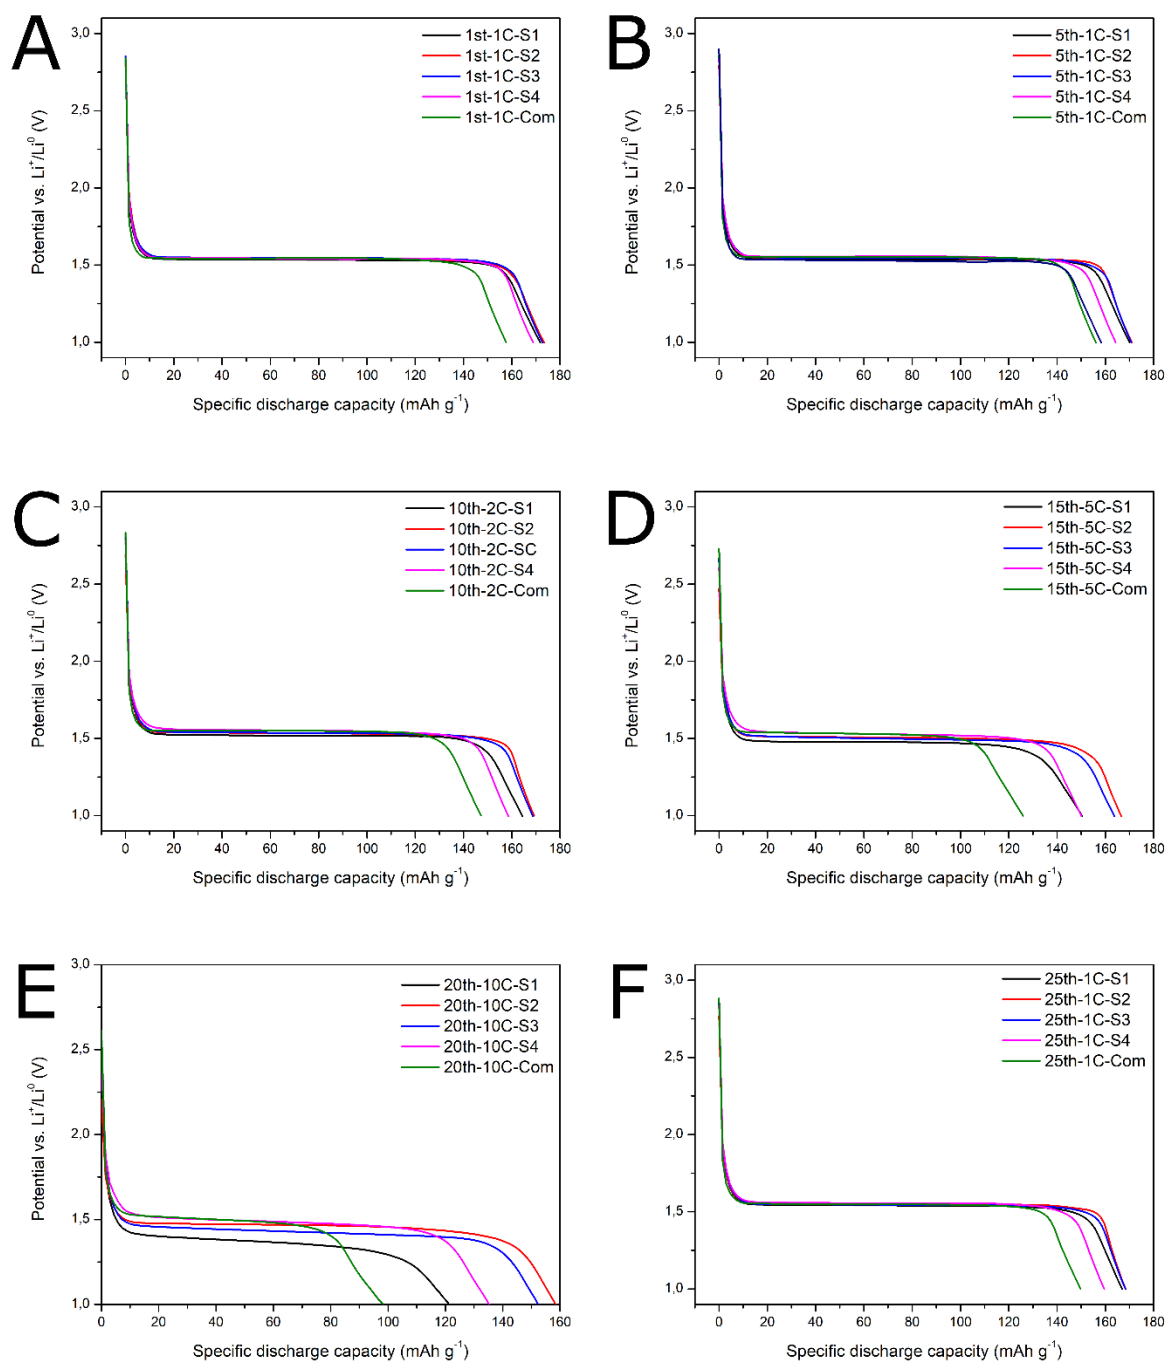

**Fig. S4.** Discharge curves of sol-gel obtained and commercial LTO samples. A) 1<sup>st</sup> cycle at 1C, B) 5<sup>th</sup> cycle at 1C, C) 10<sup>th</sup> cycle at 2C, D) 15<sup>th</sup> cycle at 5C, E) 20<sup>th</sup> cycle at 10C, F) 25<sup>th</sup> cycle at 1C

Figure S4 shows the behaviour of the different discharge curves for all samples at all rates. It is notable how the samples hold a similar behaviour at the initial 1C cycling. The most remarkable



difference is the bigger specific capacity value for the sol-gel synthesized samples respect to the commercial samples. The behaviour is kept as the discharge rate increases to 2C with a corresponding decrease in the discharge specific capacity. At 5C the lost in specific capacity for the commercial materials is around 18% and increases to approximately 40% at 10C. The plateau values for all samples decrease as the current increases as a consequence of the polarization of the cells. The bigger the polarization, the bigger the difference in the plateau at different currents and the bigger the internal resistance within the cell. It could be expected that the higher the plateau, the higher the capacity but this is not always the case. For example, sample S1 at 10C presents a higher discharge capacity than the commercial samples even though its plateau drop is bigger than for the commercial samples. The performance of the materials in term of specific energy of an operational cell will depend on both the discharge specific capacity and its plateau value: the highest the plateau and the bigger the specific capacity, the bigger the energy released by a cell.

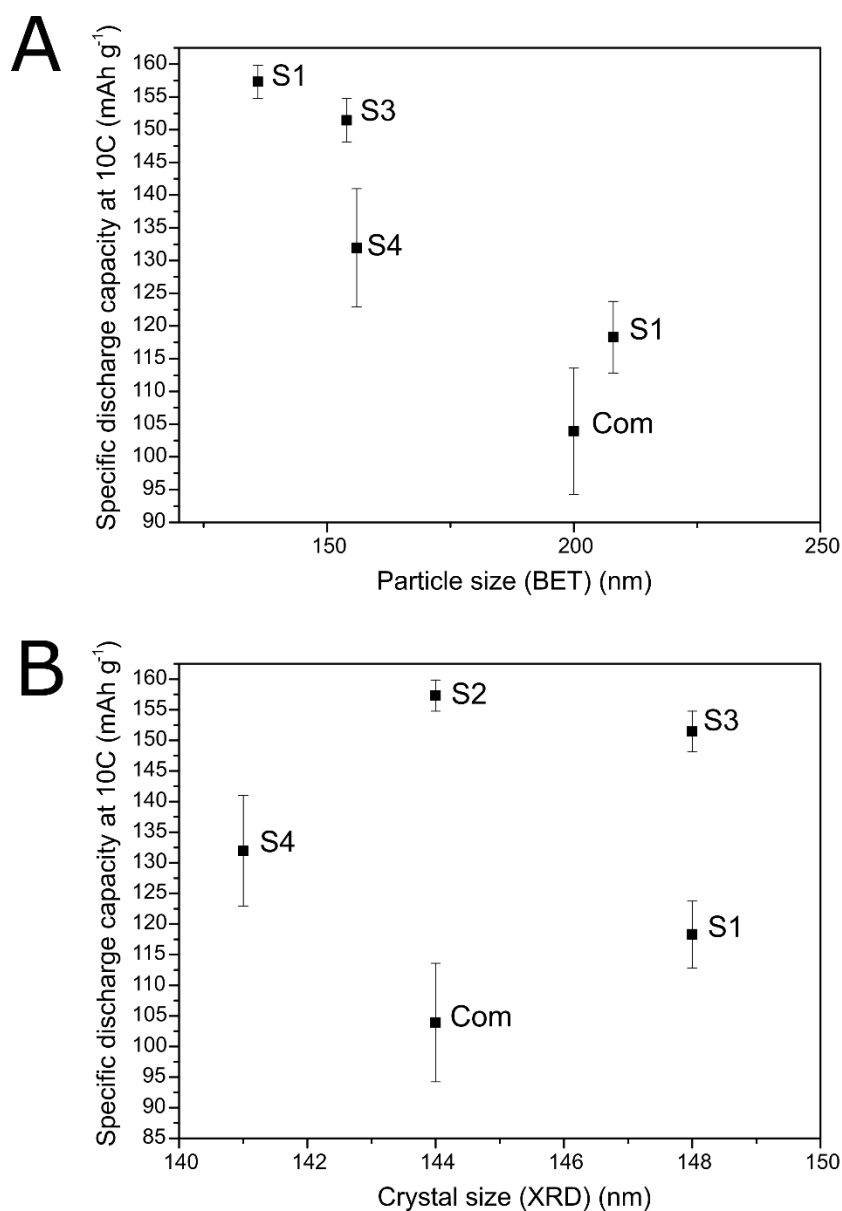

**Fig. S5.** The relation between specific discharge capacity at 10C (SDC10C) and (A) particle size calculated by BET and (B) crystal size calculated by XRD.

Figure S5 shows that the relation of the specific discharge capacity at 10C and particle size is similar to the one between SDC10C and specific surface area. At the end, both parameters are calculated from the same experimental results and alike models. It is important to keep in mind the limitations of the calculation of particle size by the BET method since many approximations are being used. For

example, that the particles are spheres. The non-existing relation between SDC10C and crystal size shows the independence of the high-rate performance of this structural characteristic.
